# Supplementary material
Source: PubMed Central journal article supplement (PMC4426296)
Supplement: Supp_Figure2.pdf [file Supp_Figure2.pdf]

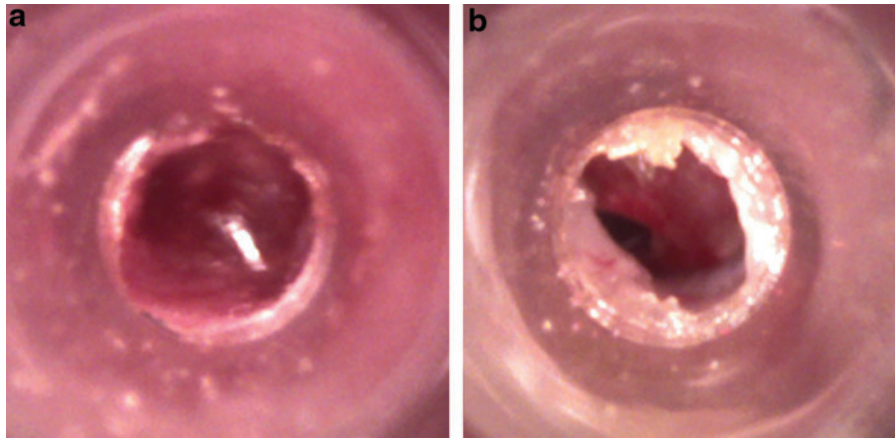

**SUPPLEMENTARY FIG. S2.** Chronic perforation with eustachian tube (ET) occlusion. Figure demonstrates the otoscopic view of a chronic perforation created with KB-R7785 and ET occlusion at 3 months. There is copious amounts of mucoid otorrhea (**a**) which obstructs the view of the TM. After gentle wicking of the otorrhea (**b**), the perforation and the thickened reddened TM can be seen.
