# Supplementary material
Source: PubMed Central journal article supplement (PMC4426296)
Supplement: Supp_Figure3.pdf [file Supp_Figure3.pdf]

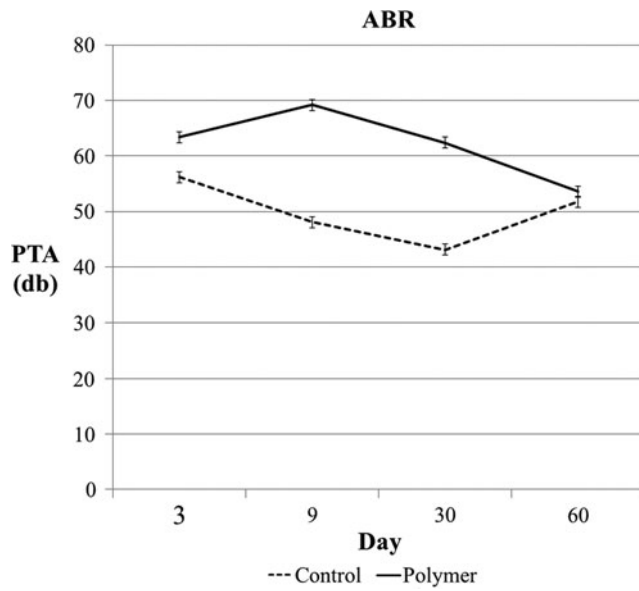

**SUPPLEMENTARY FIG. S3.** The auditory brainstem response (ABR) thresholds of the polymer-treated ears over time. Figure shows the ABR over time in the ears treated with polymer ( $n=3$ ) compared with control ears (perforation without polymer injection,  $n=3$ ). The pure tone average (PTA) of the polymer-treated ears was equivalent to control ears at day 60. This indicated that the conductive hearing loss effect of the polymer injected in the ear lasted until day 60.
