# Supplementary material
Source: PubMed Central journal article supplement (PMC4426296)
Supplement: Supp_Figure4.pdf [file Supp_Figure4.pdf]

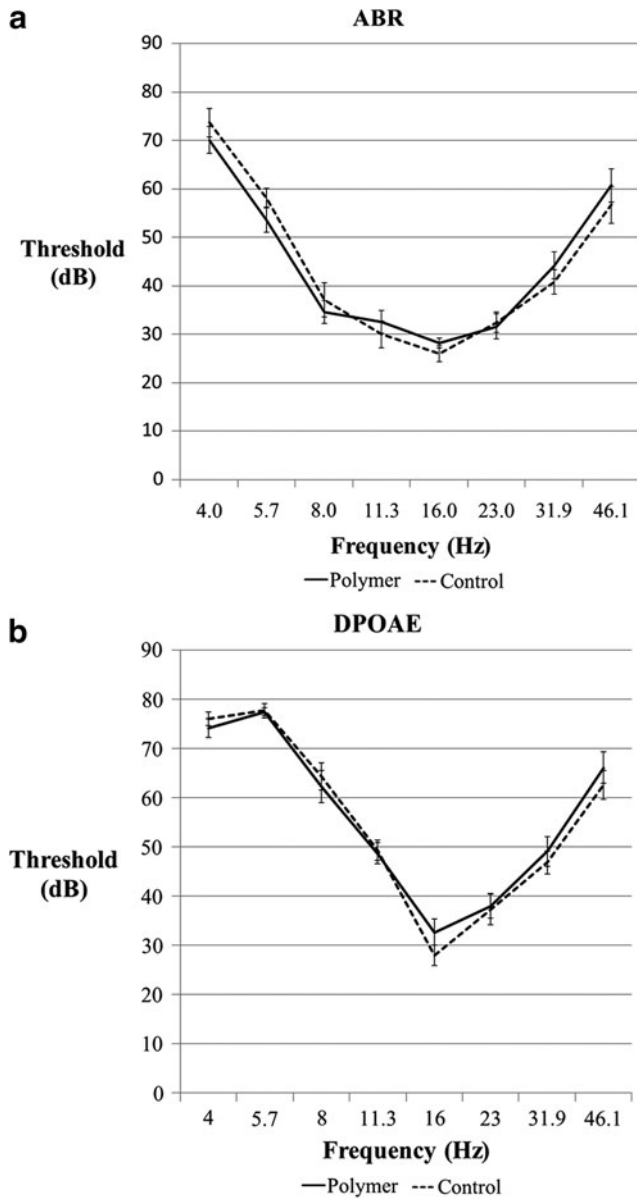

**SUPPLEMENTARY FIG. S4.** The ABR and distortion product otoacoustic emission (DPOAE) thresholds of the polymer-treated ears compared with control. Figure shows the (a) ABR and (b) DPOAE thresholds measured at 60 days in ears perforated and injected with the polymer hydrogel ( $n=9$ ) compared with control ears which were perforated only ( $n=9$ ). There were no differences between groups demonstrating a lack of ototoxicity of the hydrogel polymer in the mouse model.
